# Supplementary material for: High pathogen burden in childhood promotes the development of unconventional innate-like CD8+ T cells
Source: JCI journal article supplement (doi:10.1172/jci.insight.93814), 2017-08-02
Supplement: sd1 [file 1]

Supplemental Figure S1

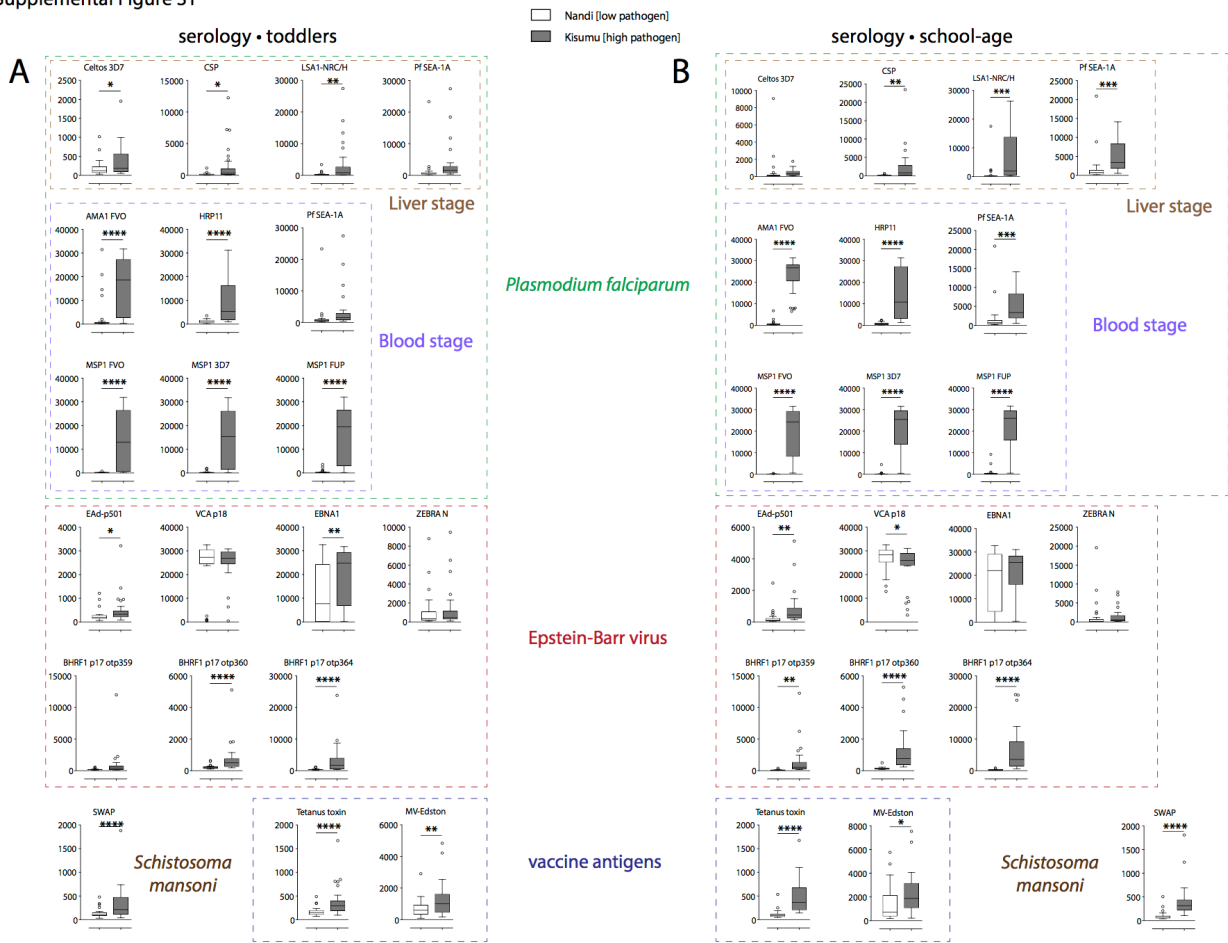

Supplemental Figure S1

**Children from Nandi (low pathogen burden area) and Kisumu (high pathogen burden area) have significantly different pathogen-specific serological profiles.**

Serum antibody titers for *Plasmodium falciparum* (Pf) malaria, EBV, schistosomiasis, were measured at a 4 year interval (toddlers to school-age) by suspension bead-based multiplex assay. Antibodies to vaccine antigens, i.e. measles and Tetanus toxoid were measured as controls. Nandi (low pathogen), n = 33; Kisumu (high pathogen), n = 31. Antibody titers (IgG) specific for Pf (HRP1, MSP1-FVO, CSP), Measles virus (Edmonston vaccine strain), *Clostridium tetani* (Tetanus), *Schistosoma mansoni* worm antigen protein (SWAP) and EBV

(EAD, ZEBRA, VCA, EBNA1) were measured using multiplex conjugated-bead suspension assay. Data on the boxplot (median and 95% IQR) displays the relative amount of antibody titers in toddlers [a] and school-age children [b] from Nandi (white bar) and Kisumu (grey bar). While open circles represent outliers, computed two-tailed unpaired t-test with Welch's correction p-values are displayed on each graph (\* P < 0.05, \*\*\* P < 0.001, \*\*\*\* P < 0.0001).

Supplemental Figure S2

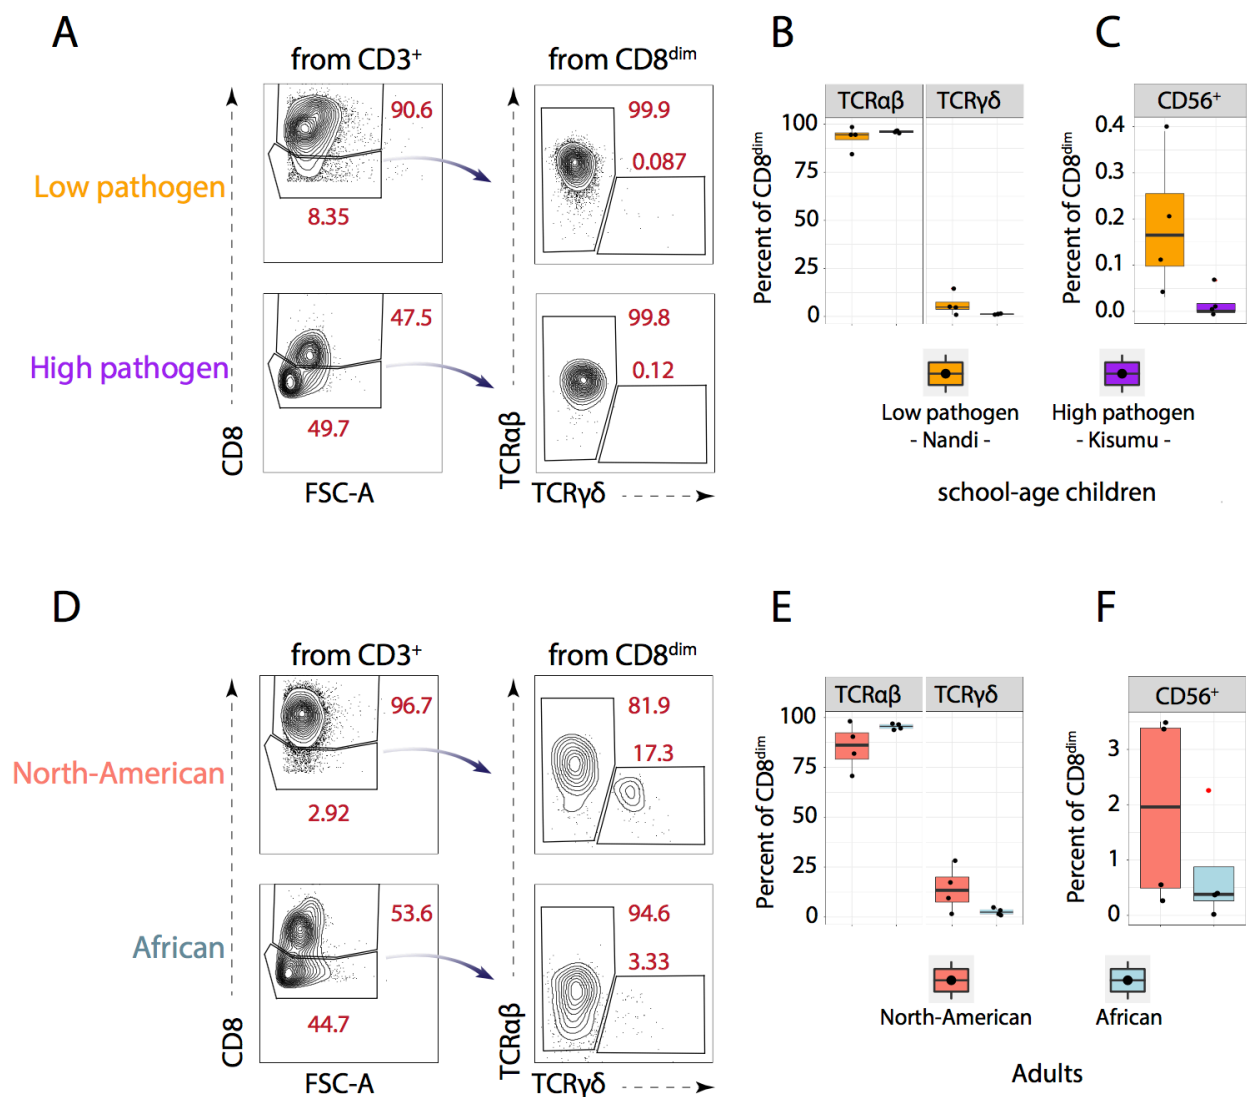

Supplemental Figure S2

### CD3<sup>+</sup> CD8<sup>dim</sup> T cells are predominantly TCRαβ and not TCRγδ T cells

Peripheral blood mononuclear cells (PBMCs) were stained with fluorescently labeled antibodies and analyzed with a multiparameter flow cytometer. **(A)** Representative bivariate plot displaying the gating strategy for CD3<sup>+</sup> CD8<sup>dim</sup> T cells from school-age children living in low pathogen (n = 4) and high pathogen (n = 4) burden areas. **(B)** Boxplot (median + 95%

IQR) displaying cumulative proportions of CD8<sup>dim</sup> T cells expressing TCR $\alpha\beta$  and TCR $\gamma\delta$ . **(C)** Boxplot (median + 95% IQR) showing cumulative proportions of CD8<sup>dim</sup> T cells expressing surface CD56. Data generated from one experiment. Black dots represent individual patients. **(D)** Representative bivariate of CD3<sup>+</sup> CD8<sup>dim</sup> T cells from North-American (n = 4) and African adults (n = 4) PBMCs. **(E)** Boxplot (median + 95% IQR) displaying cumulative proportions of CD8<sup>dim</sup> T cells expressing TCR $\alpha\beta$  and TCR $\gamma\delta$ . **(F)** Boxplot (median + 95% IQR) displaying cumulative proportions of CD8<sup>dim</sup> T cells expressing surface CD56. Black dots represent individual patients. Outliers are depicted as red dots on the graph. Data generated from one experiment.

Supplemental Figure S3

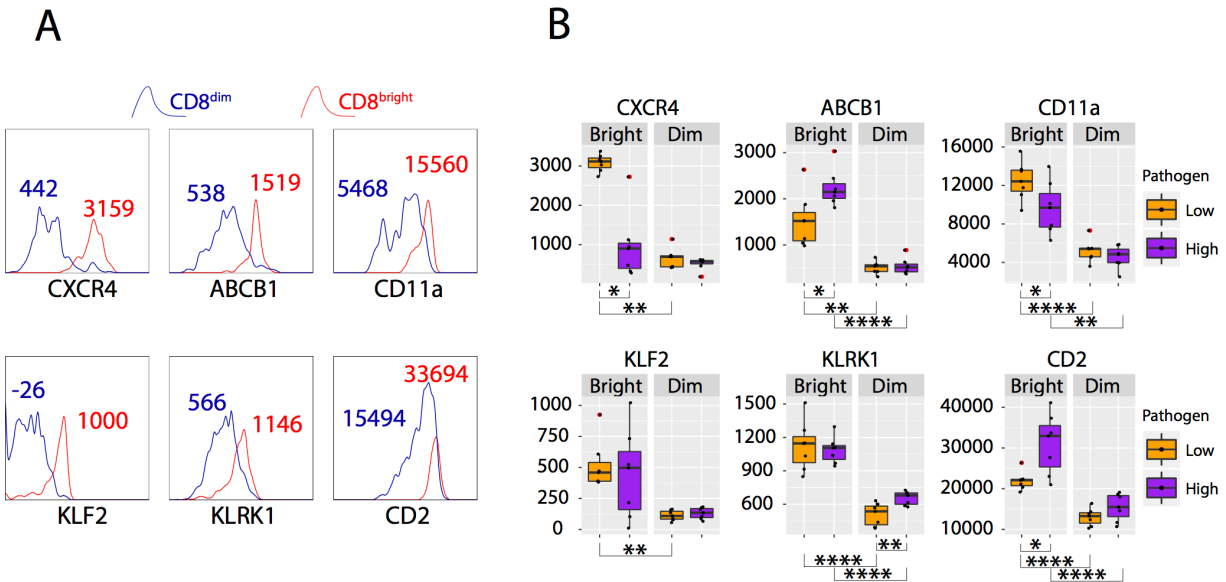

Supplemental Figure S3

**Flow cytometry validation of differentially expressed targets identified via RNA-Seq between CD8<sup>bright</sup> and CD8<sup>dim</sup> TEM cells**

Peripheral blood mononuclear cells (PBMCs) were from Nandi (n = 7) and Kisumu (n = 7) school-age children were stained with fluorescent antibodies and analyzed with a multiparameter flow cytometer. **(A)** Representative histograms of antibody staining on unstimulated T<sub>EM</sub> CD8<sup>+</sup> T cells. **(D)** Boxplot (median and 95% IQR) of MFI from **(A)**. Welch's two-tailed t test p-values are displayed (\* P < 0.05, \*\* P < 0.01, \*\*\* P < 0.001, \*\*\*\* P < 0.0001).

Supplemental Figure S4

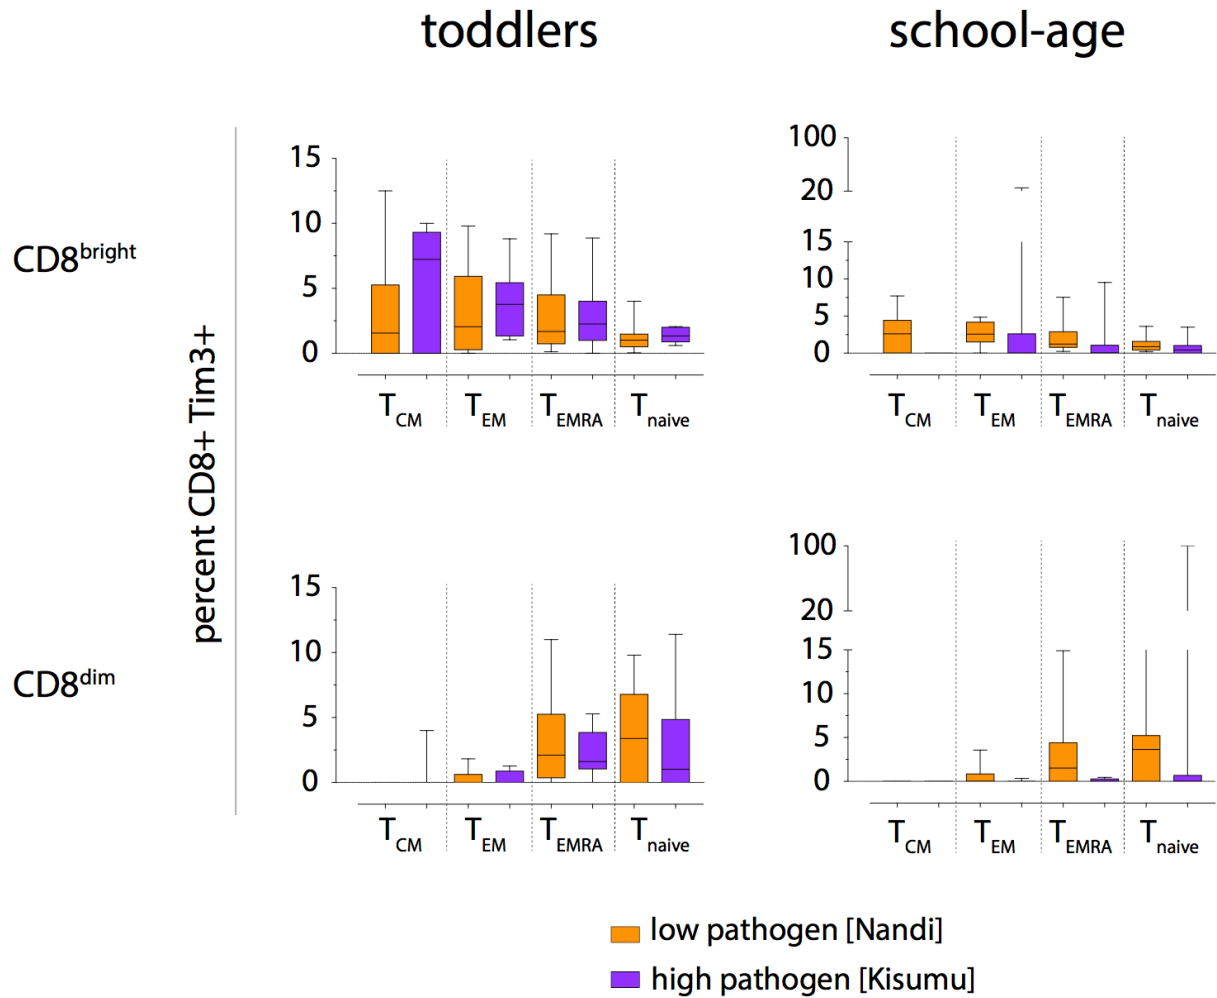

Supplemental Figure S4

**Children from Nandi and Kisumu have comparable proportions of CD8+ T cell subsets expressing Tim-3**

Peripheral blood mononuclear cells (PBMCs) were stained with fluorescently labeled antibodies. Boxplot (median and 95% IQR) displaying the proportion of CD8<sup>dim</sup> and CD8<sup>bright</sup> T cell subsets expressing Tim-3 from toddlers and school-age children from Nandi (low pathogen burden, N = 14) and Kisumu (high pathogen burden, N = 15). There was no

statistical significance between CD8+ T cell subsets expressing Tim-3 based on pathogen burden after Welch's t-test correction however there was a trend for Tim-3 expression to be lost as children aged. Data cumulated from 9 independent experiments.
